# Supplementary material for: Optimizing Antibiotic Prophylaxis for Type III Open Fractures in China: A Cost- Effectiveness Analysis
Source: Research Square preprint supplement (doi:10.21203/rs.3.rs-7118629/v1), 2025-08-04
Supplement: Supplementary file 1 [file 7d2e6c6e5d8a253331fc04ae.docx]

**Abbreviations**

SSI, Surgical site infections;

CEZ, cefazolin;

CEZ+AG, cefazolin combined with aminoglycosides;

GM, gentamycin;

AMK, amikacin;

PIPC/TAZ, piperacillin/tazobactam;

CTX, cefotaxime;

ABPC/SBT, ampicillin/sulbactam;

CTRX, ceftriaxone;

SD, standard deviation;

CNY, Chinese Yuan;

ICER, incremental cost-effectiveness ratio;

EV, expected value.

WTP, Willingness-to-pay.

**Table S1. SSI Infection Rates by Antibiotic Regimen in the Model**

| Regimens | Base value | Low value | High value | Beta distribution | |
| --- | --- | --- | --- | --- | --- |
| *α* | *β* |
| CEZ | 0.0747 | 0.0456 | 0.2903 | 36 | 446 |
| CEZ+AG | 0.0854 | 0.0376 | 0.1786 | 27 | 289 |
| PIPC/TAZ | 0.0946 | 0.0568 | 0.1892 | 7 | 67 |
| CTX | 0.1351 | 0.0811 | 0.2703 | 5 | 32 |
| ABPC/SBT | 0.2333 | 0.1400 | 0.4667 | 7 | 23 |
| CTRX | 0.2381 | 0.1429 | 0.4762 | 5 | 16 |

Notes:

1. Infection rates for each antibiotic regimen are presented to the fourth decimal place.
2. In the PSA, the infection rates were determined using the beta distribution values obtained from the specified α and β parameters.

**Table S2. Costs of SSI and Antibiotic Regimens in the Model**

| Regimens | Base value | SD | Low value | High value |
| --- | --- | --- | --- | --- |
|
| SSI | 16131.31 | 3828.90 | 6038.85 | 24794.99 |
| CEZ | 67.64 | 46.36 | 20.58 | 149.80 |
| GM | 6.06 | 4.54 | 2.38 | 20.86 |
| AMK | 3.45 | 0.25 | 3.15 | 3.90 |
| PIPC/TAZ | 216.33 | 19.24 | 180.60 | 232.40 |
| CTX | 19.37 | 5.50 | 11.55 | 30.10 |
| ABPC/SBT | 36.19 | 4.22 | 30.52 | 42.28 |
| CTRX | 24.15 | 9.20 | 10.56 | 36.48 |

Notes:

1. All costs in the table are in CNY and are rounded to two decimal places.
2. In the PSA, costs were modeled using a gamma distribution, derived from the specified mean values and SD of the respective costs.

**Table S3. Dosing Regimens for Antibiotic Prophylaxis**

| Drug | Pre - Operation | Intra - Operation | Post - Operation | Common Specifications | Average Unit Price |
| --- | --- | --- | --- | --- | --- |
| CEZ | 1g | - | 1g tid 48h | 0.5g, 1g | 8.46 |
| GM | 80mg | - | 80mg tid 48h | 40mg, 80mg | 0.80 |
| AMK | 0.2g | - | 0.2g bid 48h | 0.1g, 0.2g | 3.45 |
| PIPC/TAZ | 4.5g | - | 4.5g q8h 48h | 2.25g, 4.5g | 18.87 |
| CTX | 1g | 1g | 1g tid 48h | 0.5g, 1g | 2.56 |
| ABPC/SBT | 3g | - | 4.5g q8h 48h | 0.75g, 1.5g | 36.19 |
| CTRX | 2g | - | 2g qd 48h | 0.25g, 0.5g, 1g | 2.33 |

Notes:

1. The dosing regimens for each antibiotic were obtained from a combination of product labels, clinical guidelines, and clinical experience to ensure that the prescribed dosages reflect commonly accepted practices in the treatment of Type III open fractures.
2. The cost for each regimen, as shown in Table 2, was calculated based on the dosing regimen outlined in this table.
3. In our study, the CEZ+AG regimen includes the CEZ dosing from this table, with the addition of either the GM or AMK dosing from this table.

**Table S4. Utility Values for SSI and Non-SSI at 90 Days Post-Surgery**

| State | Mean | SD | 95% Confidence Interval | |
| --- | --- | --- | --- | --- |
| Low value | High value |
| SSI | 0.2500 | 0.3117 | 0.1266 | 0.3734 |
| No SSI | 0.3500 | 0.3453 | 0.3108 | 0.3892 |

Notes:

1. All utility values in the table are rounded to four decimal places.
2. In the PSA, health utility values were modeled using a normal distribution, derived from the specified mean values and SD.


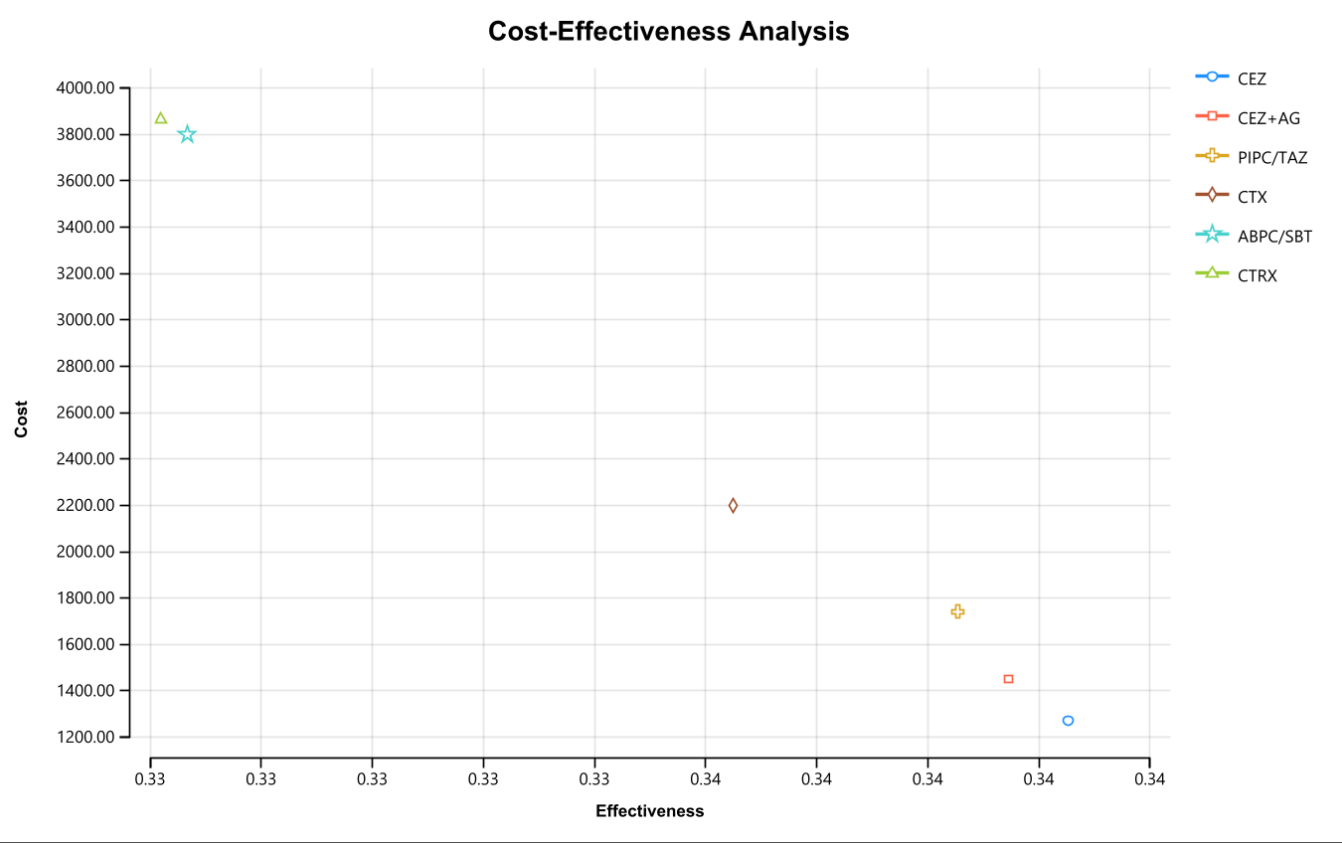


**Figure S1. Cost-Effectiveness Acceptability Curve**

**
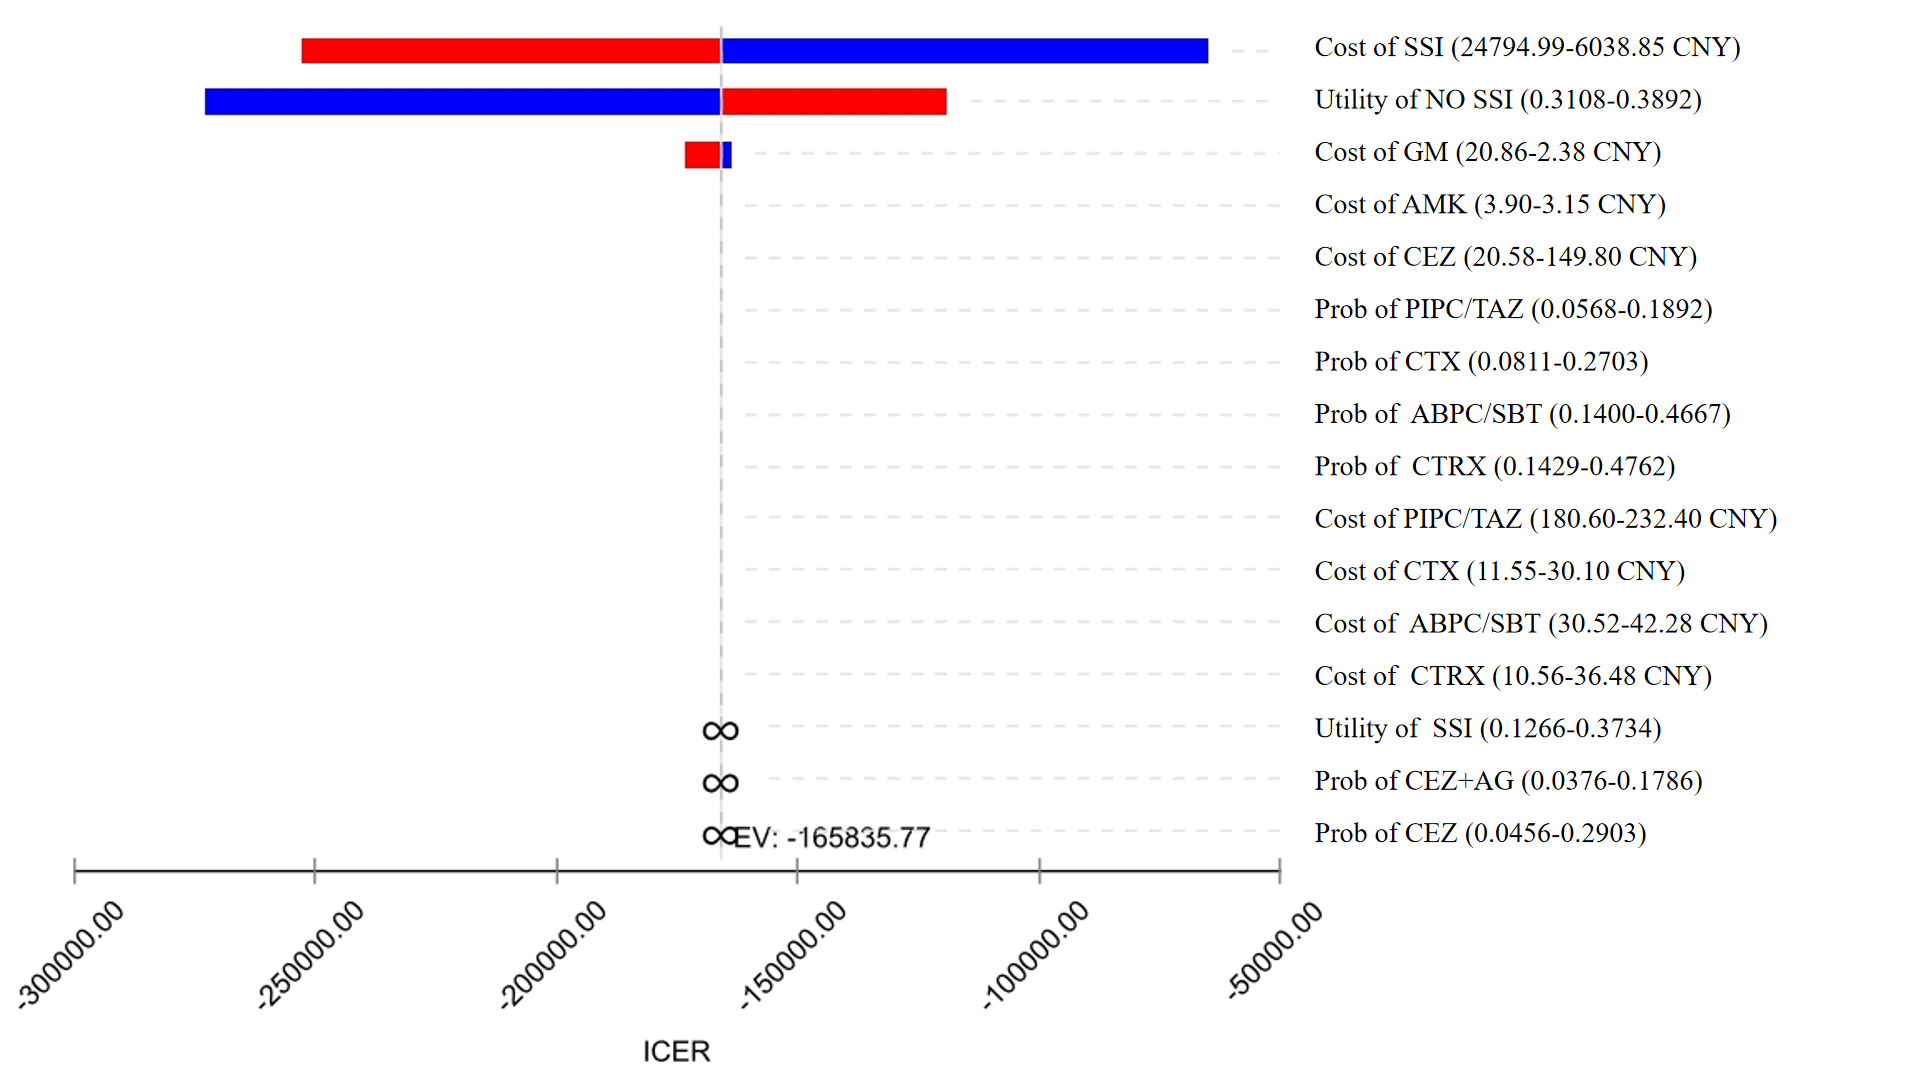
**

**Figure S2. Tornado Diagram Comparing CEZ with CEZ+AG**


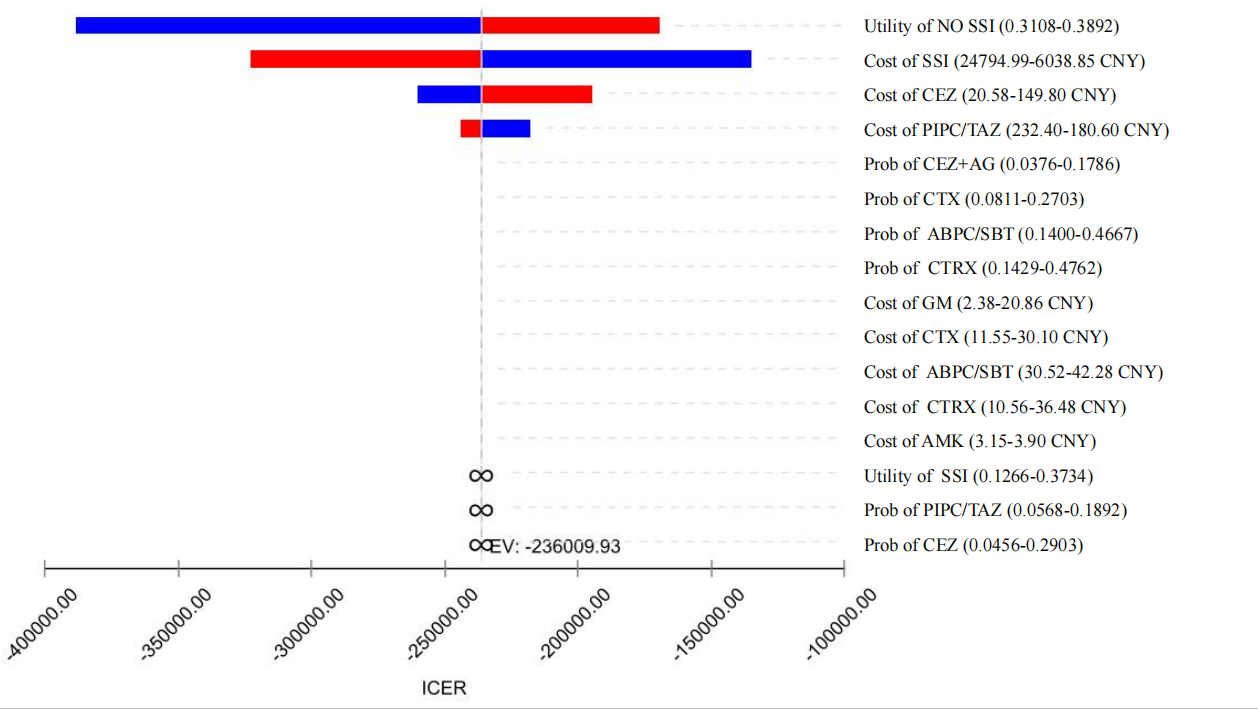


**Figure S3. Tornado Diagram Comparing CEZ with PIPC/TAZ**


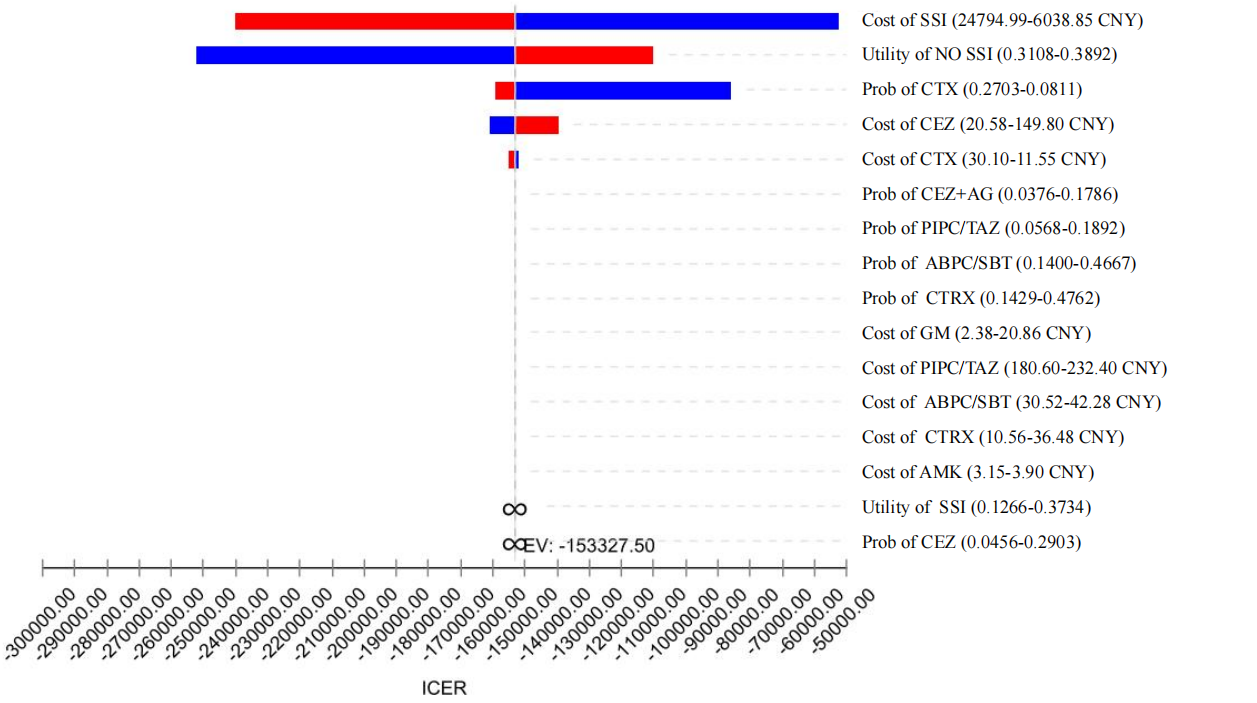


**Figure S4. Tornado Diagram Comparing CEZ with CTX**

**
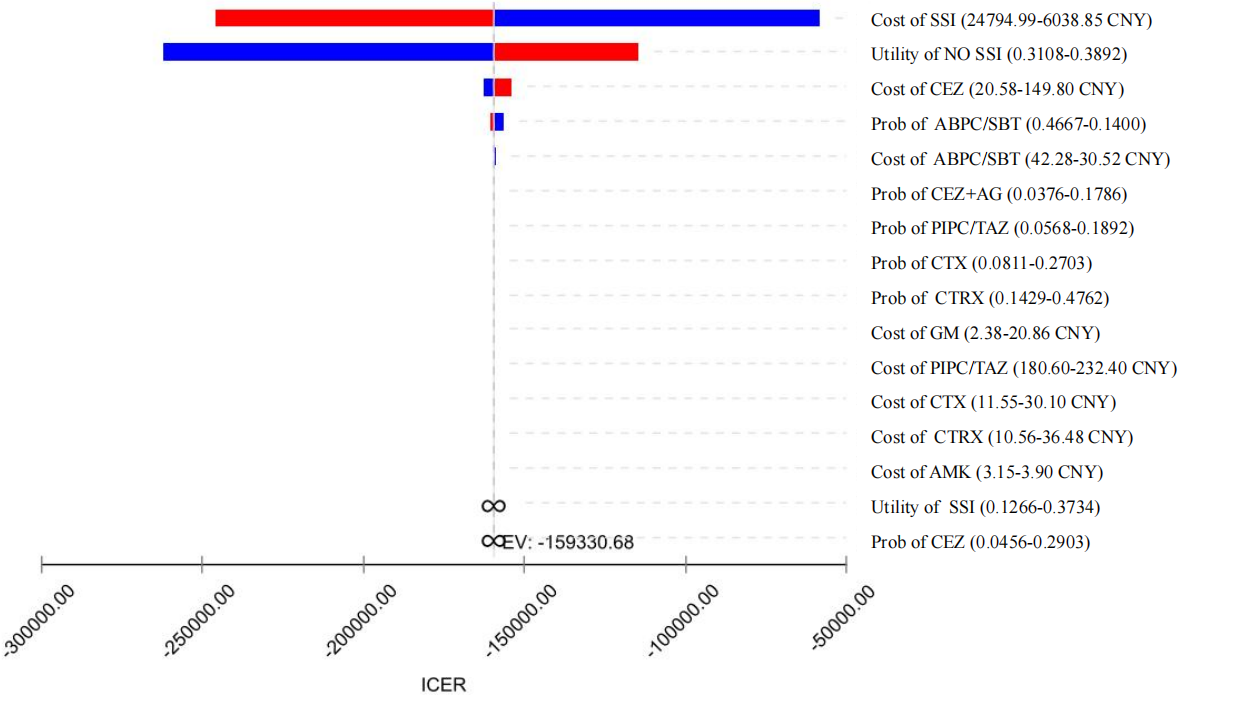
**

**Figure S5. Tornado Diagram Comparing CEZ with ABPC/SBT**

**
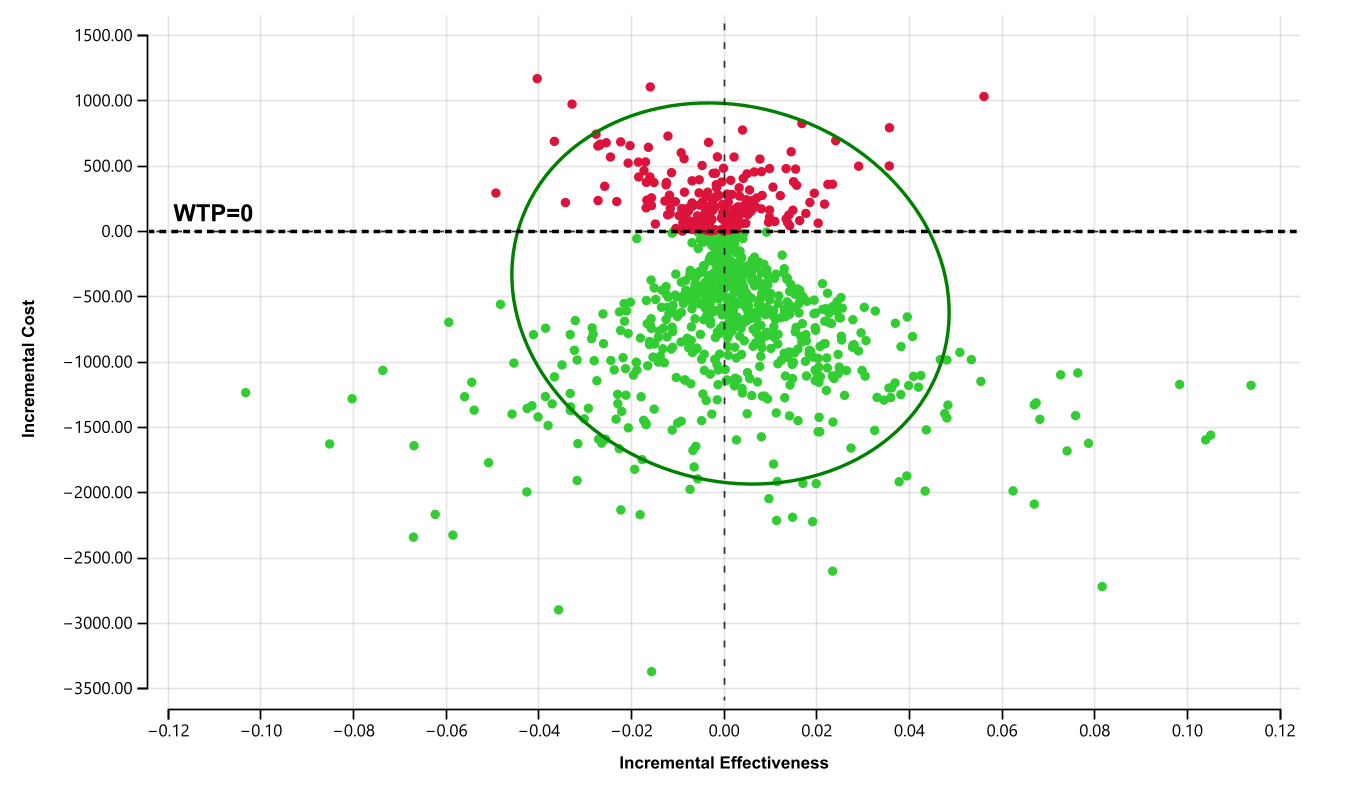
**

**Figure S6. Monte Carlo Simulation Scatter Plot (comparing CEZ to PIPC/TAZ)**

**
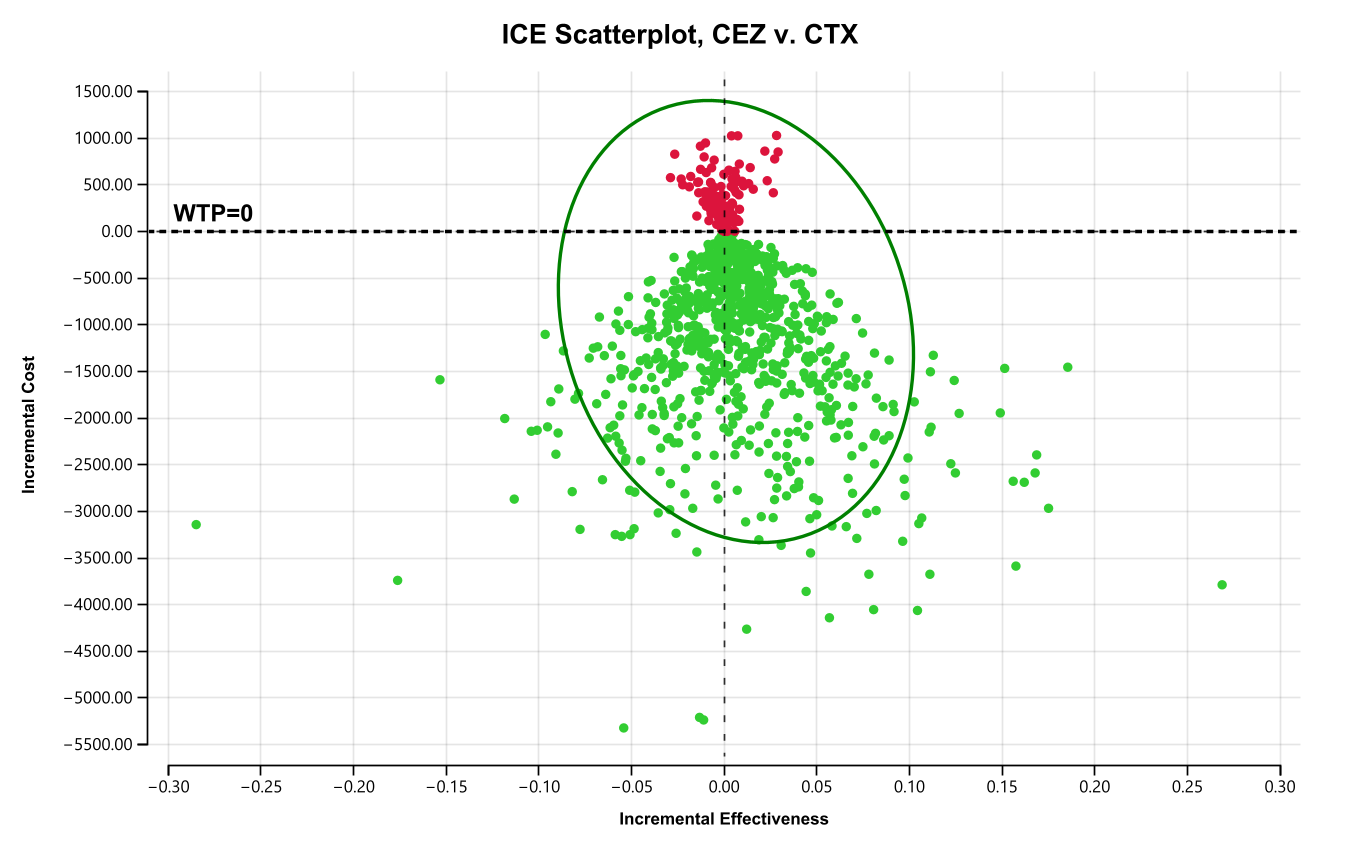
**

**Figure S7. Monte Carlo Simulation Scatter Plot (comparing CEZ to CTX)**

**
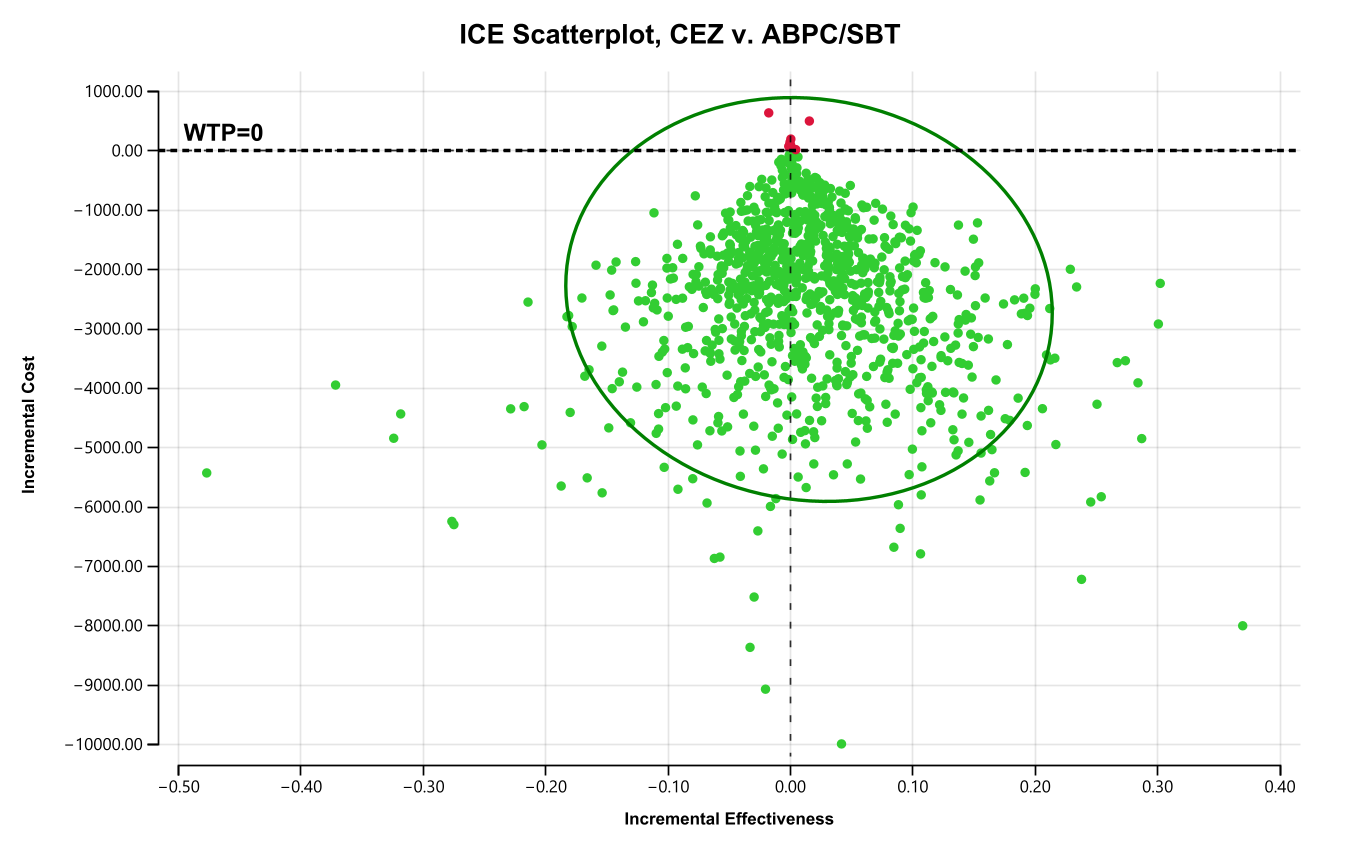
**

**Figure S8. Monte Carlo Simulation Scatter Plot (comparing CEZ to ABPC/SBT)**


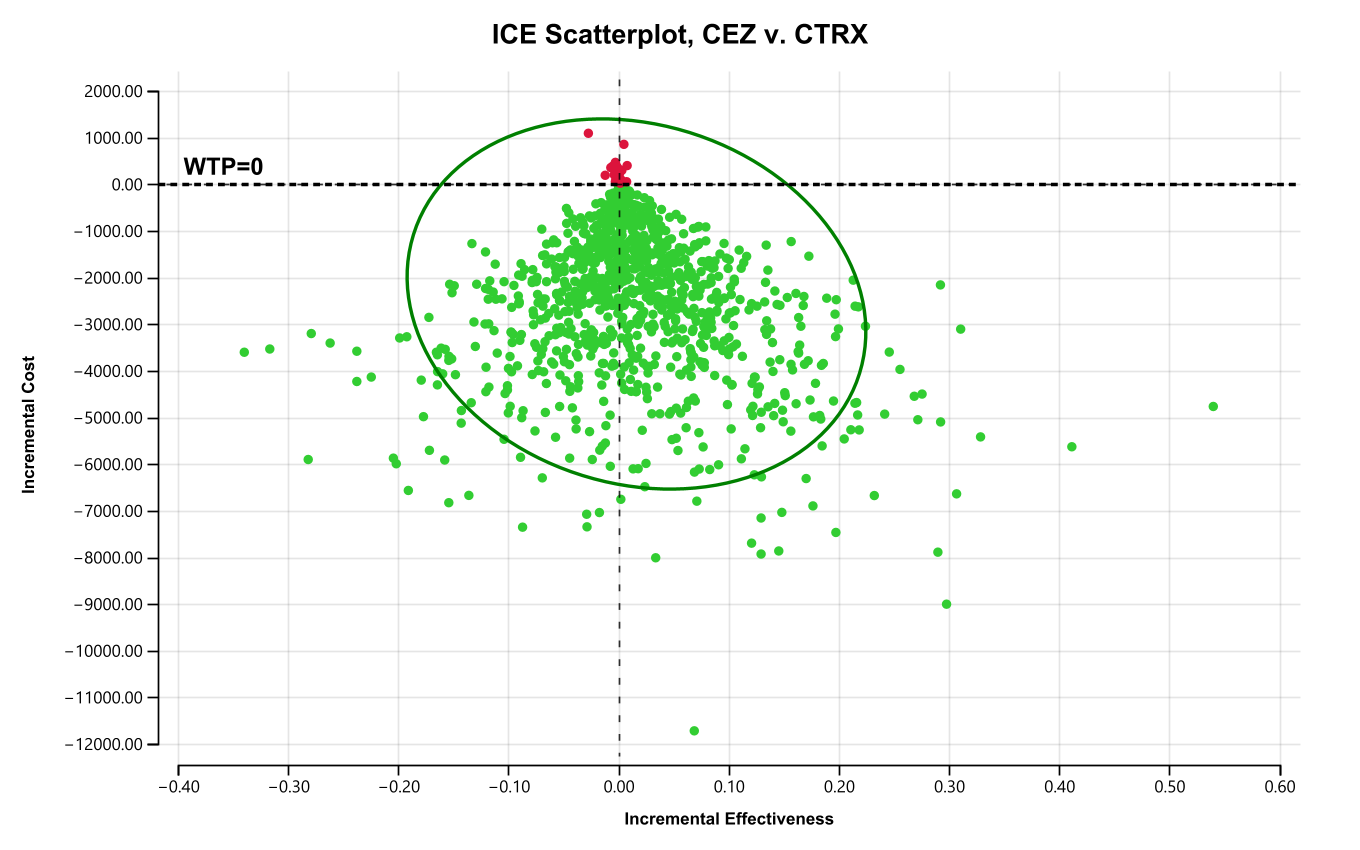


**Figure S9. Monte Carlo Simulation Scatter Plot (comparing CEZ to CTRX)**
